# Supplementary material for: Obesity Drives STAT-1-Dependent NASH and STAT-3-Dependent HCC
Source: PubMed Central journal article supplement — Cell. 2018 Nov 15;175(5):1289–1306.e20. doi: 10.1016/j.cell.2018.09.053 (PMC6242467; doi:10.1016/j.cell.2018.09.053), 2018-11-15
Supplement: mmc1.pdf [file mmc1.pdf]

**Cell, Volume 175**

**Supplemental Information**

**Obesity Drives STAT-1-Dependent NASH  
and STAT-3-Dependent HCC**

**Marcus Grohmann, Florian Wiede, Garron T. Dodd, Esteban N. Gurzov, Geraldine J. Ooi, Tariq Butt, Aliko A. Rasmiena, Supreet Kaur, Twishi Gulati, Pei K. Goh, Aislinn E. Treloar, Stuart Archer, Wendy A. Brown, Mathias Muller, Matthew J. Watt, Osamu Ohara, Catriona A. McLean, and Tony Tiganis**

**Supplementary Table 1. Patient Characteristics – Related to Figure 4.**

| <b>Obese No Steatosis</b> |               |            |                  |                     |                   |            |                 |
|---------------------------|---------------|------------|------------------|---------------------|-------------------|------------|-----------------|
| <i>Age</i>                | <i>Gender</i> | <i>BMI</i> | <i>Steatosis</i> | <i>Inflammation</i> | <i>Ballooning</i> | <i>NAS</i> | <i>Fibrosis</i> |
| 46                        | F             | 38.5       | 0                | 0                   | 0                 | 0          | 0               |
| 61                        | M             | 47.4       | 0                | 0                   | 0                 | 0          | 0               |
| 61                        | F             | 41.7       | 0                | 0                   | 0                 | 0          | 0               |
| 39                        | F             | 43.8       | 0                | 0                   | 0                 | 0          | 0               |
| 33                        | M             | 41.5       | 0                | 0                   | 0                 | 0          | 0               |
| 49                        | F             | 36.3       | 0                | 0                   | 0                 | 0          | 0               |
| 23                        | F             | 61.2       | 0                | 0                   | 0                 | 0          | 0               |
| <b>Obese Steatosis</b>    |               |            |                  |                     |                   |            |                 |
| <i>Age</i>                | <i>Gender</i> | <i>BMI</i> | <i>Steatosis</i> | <i>Inflammation</i> | <i>Ballooning</i> | <i>NAS</i> | <i>Fibrosis</i> |
| 59                        | M             | 49.6       | 1                | 0                   | 0                 | 1          | 0               |
| 55                        | F             | 39.2       | 1                | 0                   | 0                 | 1          | 0               |
| 41                        | F             | 36.2       | 1                | 0                   | 0                 | 1          | 0               |
| 49                        | F             | 40.7       | 1                | 0                   | 0                 | 1          | 0               |
| 28                        | M             | 48.2       | 1                | 0                   | 0                 | 1          | 0               |
| 56                        | M             | 61.2       | 2                | 0                   | 0                 | 2          | 0               |
| 34                        | F             | 50         | 1                | 0                   | 0                 | 1          | 0               |
| 40                        | F             | 43.7       | 2                | 0                   | 0                 | 2          | 0               |
| <b>Obese NASH</b>         |               |            |                  |                     |                   |            |                 |
| <i>Age</i>                | <i>Gender</i> | <i>BMI</i> | <i>Steatosis</i> | <i>Inflammation</i> | <i>Ballooning</i> | <i>NAS</i> | <i>Fibrosis</i> |
| 46                        | M             | 39.6       | 2                | 0                   | 2                 | 4          | 0               |
| 64                        | F             | 42.5       | 2                | 1                   | 1                 | 4          | 1a              |
| 38                        | F             | 46.3       | 2                | 1                   | 1                 | 4          | 1a              |
| 24                        | F             | 48.3       | 2                | 1                   | 1                 | 4          | 1               |
| 45                        | F             | 43.2       | 2                | 1                   | 1                 | 4          | 1a              |
| 50                        | F             | 46.9       | 2                | 1                   | 1                 | 4          | 1a              |
| 52                        | F             | 47.2       | 3                | 1                   | 2                 | 6          | 1b              |
| 30                        | M             | 74         | 2                | 1                   | 2                 | 5          | 1a              |
| 31                        | F             | 53.3       | 2                | 1                   | 2                 | 5          | 1a              |
| 47                        | M             | 48.5       | 3                | 1                   | 2                 | 6          | 2               |
| 51                        | F             | 52.1       | 2                | 1                   | 2                 | 5          | 1a              |
| 37                        | F             | 49         | 2                | 1                   | 2                 | 5          | 1a              |
| 30                        | F             | 56.9       | 3                | 1                   | 1                 | 5          | 0               |

Liver core biopsies from obese patients undergoing bariatric surgery taken on the day of surgery were fixed in formalin and processed for histology. The NAFLD Activity Score (NAS), which is the unweighted sum of the steatosis (0-3), lobular inflammation (0-3) and hepatocellular ballooning (0-2) scores, and the fibrosis score [0-4; perisinusoidal or periportal fibrosis (score 1) is denoted as 1a, 1b] were determined.
